# Supplementary material for: Sea surface temperature and torrential rains in the Valencia region: modelling the role of recharge areas
Source: Copernicus journal article supplement (doi:10.5194/nhess-15-1677-2015), 2015-07-31
Supplement: Supplementary file 1 [file nhess-15-1677-2015-supplement.zip]

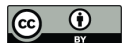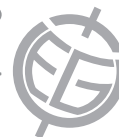

## *Supplement of*

# **Sea surface temperature and torrential rains in the Valencia region: modelling the role of recharge areas**

**F. Pastor et al.**

*Correspondence to:* F. Pastor (paco@ceam.es)

- nhess-15-1677-2015-supplement-title-page.pdf
- E0989-vertical-velocity-thetae-mosaic.png
- E1000-vertical-velocity-thetae-mosaic.png
- E1007-vertical-velocity-thetae-mosaic.png
- Observed-precipitation-mosaic.png
- SST-data-and-clustering.png

The copyright of individual parts of the supplement might differ from the CC-BY 3.0 licence.
